# Supplementary material for: Identification of the Linear Fc-Binding Site on the Bovine IgG1 Fc Receptor (boFcγRIII) Using Synthetic Peptides
Source: MDPI journal article supplement (doi:10.3390/vetsci11010024), 2024-01-08
Supplement: s1 [file s1]

## Supplementary Figures

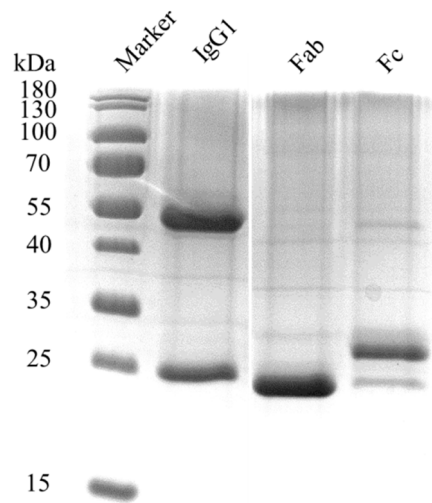

**Figure S1.** SDS-PAGE analysis of the purified bovine IgG1, as well as its Fab and Fc fragments.

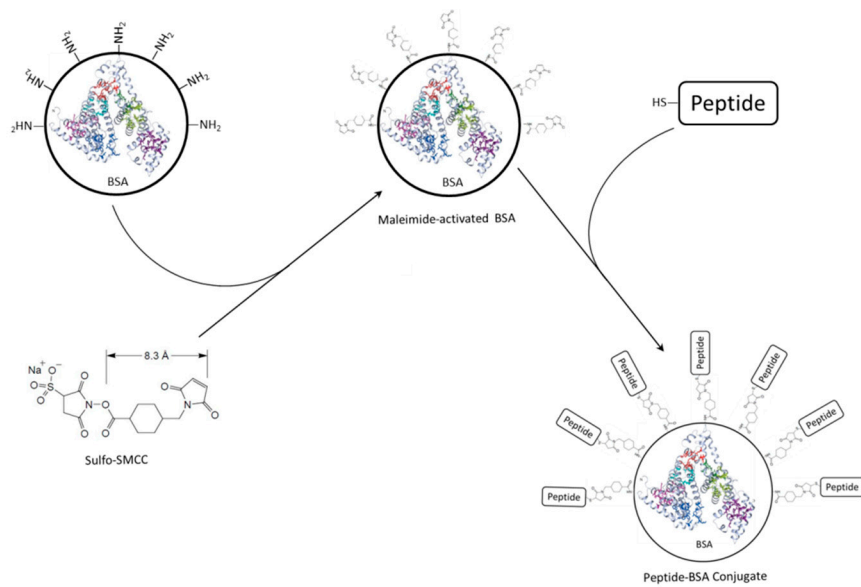

**Figure S2.** Two-step reaction scheme for conjugating peptide and BSA with Sulfo-SMCC.

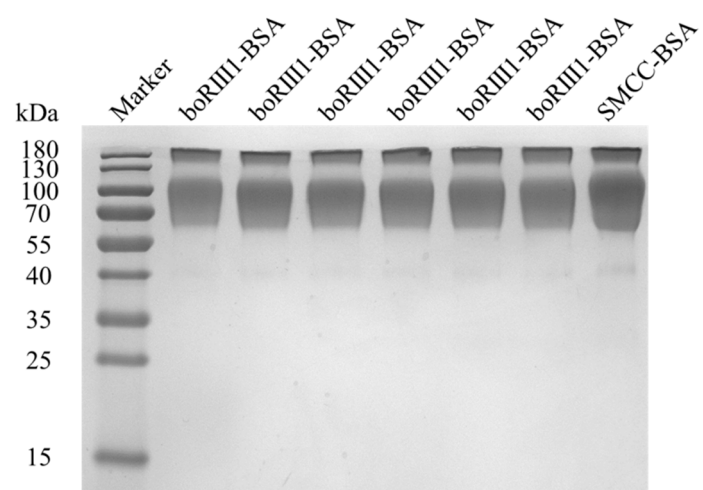

**Figure S3.** SDS-PAGE analysis of the boFc $\gamma$ RIII peptides coupled with BSA.
